# Supplementary material for: Assessing global drinking water potential from electricity-free solar water evaporation device
Source: PubMed Central journal article supplement (PMC11310480; doi:10.1038/s41467-024-51115-0), 2024-08-08
Supplement: 41467_2024_51115_MOESM1_ESM.pdf [file 41467_2024_51115_MOESM1_ESM.pdf]

1  
2  
3  
4  
5  
6  
7  
8  
9  
10  
11  
12  
13  
14  
15  
16  
17  
18  
19  
20  
21

## Supplementary information

### **Assessing Global Drinking Water Potential from Electricity-free Solar Water Evaporation Device**

Wei Zhang<sup>1,2,3</sup>, Yongzhe Chen<sup>4</sup>, Qinghua Ji<sup>1\*</sup>, Yuying Fan<sup>2,5</sup>, Gong Zhang<sup>1</sup>, Xi Lu<sup>1</sup>, Chengzhi Hu<sup>2,3</sup>, Huijuan Liu<sup>1</sup>, and Jihui Qu<sup>1,2,3\*</sup>

<sup>1</sup> Center for Water and Ecology, State Key Joint Laboratory of Environment Simulation and Pollution Control, School of Environment, Tsinghua University, Beijing 100084

<sup>2</sup> Key Laboratory of Drinking Water Science and Technology, Research Center for Eco-Environmental Sciences, Chinese Academy of Sciences, Beijing 100085, China

<sup>3</sup> University of Chinese Academy of Sciences, Beijing 100049, China

<sup>4</sup> Department of Geography, The University of Hong Kong, Hong Kong, China

<sup>5</sup> School of Environment, Northeast Normal University, Changchun 130117, China

|    |                                                                                                                                      |    |
|----|--------------------------------------------------------------------------------------------------------------------------------------|----|
| 22 | <b>Contents:</b>                                                                                                                     |    |
| 23 |                                                                                                                                      |    |
| 24 | <b>Supplementary Note 1. Fabrication of the coating of the glass</b> .....                                                           | 4  |
| 25 | Supplementary Fig. 1 Distribution of the population without safely managed drinking water (SMDW)                                     |    |
| 26 | according to the annual precipitation.....                                                                                           | 4  |
| 27 | Supplementary Fig. 2 Distribution of the population without safely managed drinking water (SMDW)                                     |    |
| 28 | according to the income levels. ....                                                                                                 | 5  |
| 29 | Supplementary Fig. 3 The picture of the setups of the case 1–5. ....                                                                 | 5  |
| 30 | Supplementary Fig. 4 The conductivity of the produced water by solar water evaporation (SWE). ....                                   | 6  |
| 31 | Supplementary Fig. 5 The ion concentration of the produced water by solar water evaporation (SWE).                                   |    |
| 32 | (a) Cl <sup>-</sup> . (b)SO <sub>4</sub> <sup>2-</sup> (The red dashed line is the World Health Organization-defined criteria). .... | 7  |
| 33 | Supplementary Fig. 6 Operation parameters in cases 1–5 and of the environment.....                                                   | 8  |
| 34 | <b>Supplementary Note 2. The dependence of solar-water energy efficiency</b> .....                                                   | 9  |
| 35 | Supplementary Fig. 7 The linear regression between solar-water energy efficiency and (a) Day                                         |    |
| 36 | (Slope=-0.03, <i>p</i> =0.51, ns), (b) Solar irradiance (Slope=3.6, <i>p</i> =0.001, ***). (c) Between-group                         |    |
| 37 | comparisons of the day, energy efficiency, and solar irradiance (Day vs. Energy efficiency, <i>p</i> >0.05,                          |    |
| 38 | ns; Energy efficiency vs. Solar irradiance, <i>p</i> <0.0001, ****).....                                                             | 9  |
| 39 | Supplementary Table 1 The Spearman coefficients between solar-water energy efficiency and Day or                                     |    |
| 40 | Solar irradiance.....                                                                                                                | 10 |
| 41 | Supplementary Fig. 8 Data processing workflow of the physics-guided machine learning model.....                                      | 11 |
| 42 | Supplementary Fig. 9 The selected sites for the training sets of the physics-guided machine learning                                 |    |
| 43 | model. ....                                                                                                                          | 12 |
| 44 | Supplementary Table 2. Locations of the selected 30 cities over the world .....                                                      | 12 |
| 45 | Supplementary Fig. 10 The importance of each input parameter in the physics-guided machine learning                                  |    |
| 46 | model for (a) evaporation-optimized case (Eva. opt.) and (b) evaporation-condensation-optimized                                      |    |
| 47 | case (Eva.-cond. opt.). ....                                                                                                         | 13 |
| 48 | Supplementary Fig. 11 Global distribution of the surface downward shortwave irradiation (DSW)..                                      | 14 |
| 49 | Supplementary Fig. 12 The violin plot of annual average safely managed drinking water (SMDW)                                         |    |
| 50 | yield under the three scenarios. ....                                                                                                | 14 |
| 51 | Supplementary Fig. 13 Seasonal variations of the safely managed drinking water (SMDW) yield for 6                                    |    |
| 52 | six representative cities across the world.....                                                                                      | 15 |
| 53 | Supplementary Fig. 14 Pyramid chart of country data on average annual water production and water-                                    |    |
| 54 | scarce population (evaporation-condensation-optimized system).....                                                                   | 16 |
| 55 | Supplementary Fig. 15 Four quadrant charts of the annual safely managed drinking water (SMDW)                                        |    |
| 56 | yield (evaporation-optimized system) concerning the population without SMDW of different                                             |    |
| 57 | income-level countries.....                                                                                                          | 17 |
| 58 | Supplementary Fig. 16 Pyramid chart of country data on average annual safely managed drinking water                                  |    |

|    |                                                                                                     |    |
|----|-----------------------------------------------------------------------------------------------------|----|
| 59 | (SMDW) production and water-scarce population (evaporation-optimized system).....                   | 18 |
| 60 | Supplementary Fig. 17 Four quadrant charts of the annual safely managed drinking water (SMDW)       |    |
| 61 | yield (Upper limit) concerning the population without SMDW of different income-level countries.     |    |
| 62 | .....                                                                                               | 19 |
| 63 | Supplementary Fig. 18 Pyramid chart of country data on average annual safely managed drinking water |    |
| 64 | (SMDW) production and water-scarce population (upper limit).....                                    | 20 |
| 65 | Supplementary Fig. 19 Map of the Capital expense per capita of SWE (evaporation-condensation-       |    |
| 66 | optimized system).....                                                                              | 21 |
| 67 | Supplementary Fig. 20 Schematic diagrams of the COMSOL model setups. ....                           | 22 |
| 68 | <b>Supplementary Note 3. Cost estimation</b> .....                                                  | 22 |
| 69 | Supplementary Table 3 The capital cost per area.....                                                | 22 |
| 70 | Supplementary Table 4 Labor cost estimation .....                                                   | 24 |
| 71 |                                                                                                     |    |
| 72 |                                                                                                     |    |

73 **Supplementary Note 1. Fabrication of the coating of the glass**

74 Typically, sodium alginate (SA) and polyvinyl alcohol (PVA) was dissolved by the mass fraction of 4  
75 wt% and 10 wt%, respectively. SA and PVA solutions were mixed by a ratio of 2:1 (v/v). A glass plate  
76 was subsequently cleaned with acetone, ethanol, and water. Then this glass plate was immersed in the  
77 PEI aqueous solution (10 wt%) for 30 s and taken out to be dried at room temperature. Syringe nozzles  
78 with holes (1.0 mm in diameter) in a row were fabricated by 3D printing, and the spacing between  
79 aligned holes was designed at 1.0 mm. Before coating the HWT onto the glass plate, the glass plate  
80 was frozen to 263.15 K in the refrigerator. A syringe pump was used to control the injection rate of the  
81 HWT precursor ( $1.5 \text{ mL min}^{-1}$ ), and the scan rate of the syringe nozzle was set as  $5 \text{ mm s}^{-1}$ . After  
82 coating, the precursor quickly got frozen, and the glass plate was stored in the refrigerator at 253.15 K  
83 for 2 h. Then it was taken out to thaw and this freeze-thaw process was repeated 3 times. Then it was  
84 immersed in  $0.25 \text{ mol L}^{-1} \text{ CaCl}_2$  solution for 30 min and then taken out for rinsing.

85

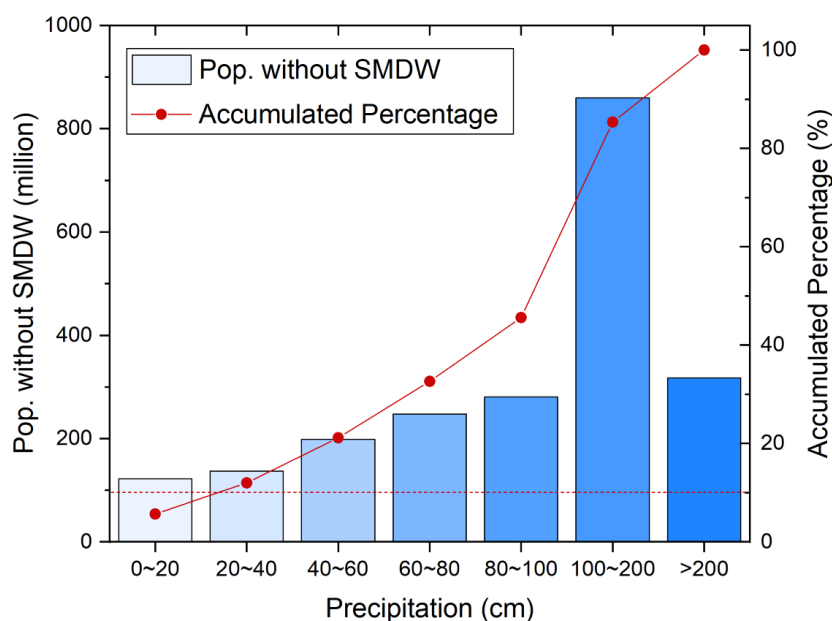

86

87 Supplementary Fig. 1 Distribution of the population without safely managed drinking water (SMDW)  
88 according to the annual precipitation.

89

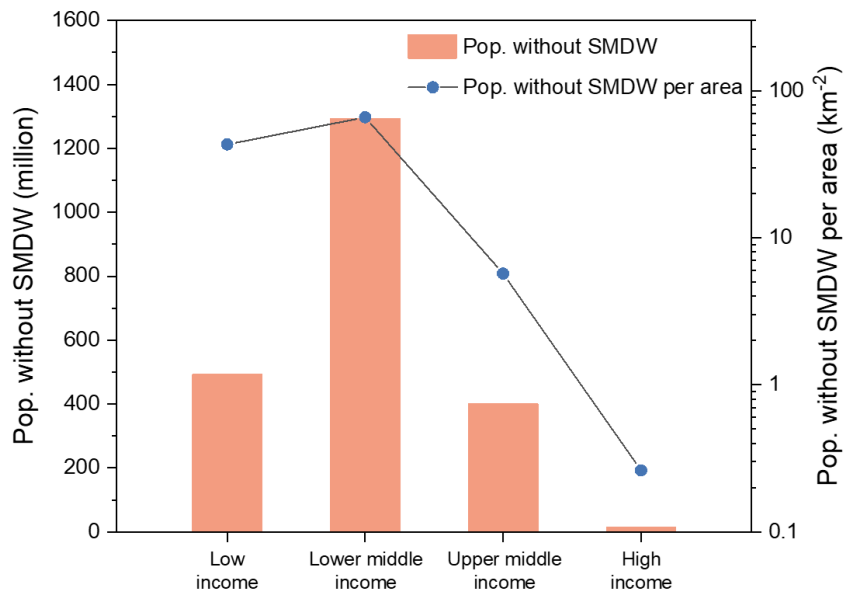

90

91 Supplementary Fig. 2 Distribution of the population without safely managed drinking water (SMDW)  
 92 according to the income levels.

93

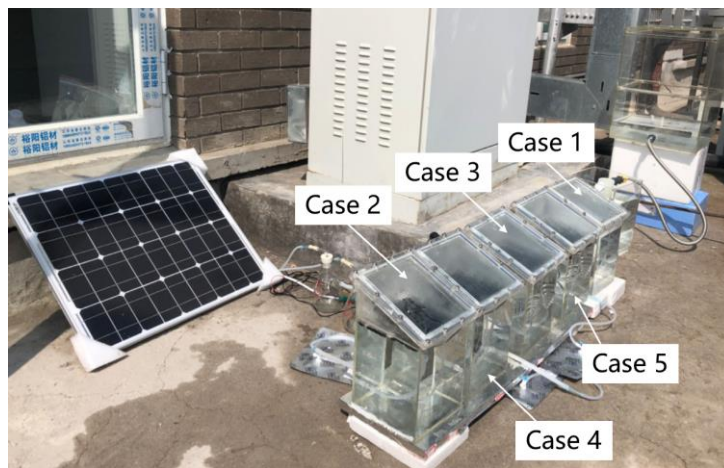

94

95 Supplementary Fig. 3 The picture of the setups of the case 1–5. Case 1 is a reference system without  
 96 solar evaporators. Case 2 includes solar evaporators. Case 3 further pumps vapor out through a  
 97 condensing tube for forced condensation with additional photovoltaics. Case 4 uses coated glass  
 98 (condensation-enhanced) to condense the water without external energy input. Case 5 integrates both  
 99 the condensing tube (powered by photovoltaics) and condensation-enhanced glass for condensation.

100

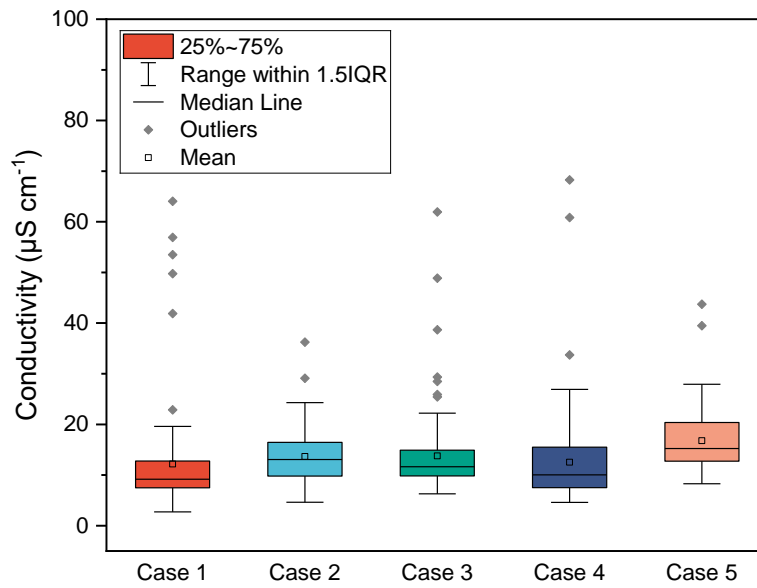

101

102 Supplementary Fig. 4 The conductivity of the produced water by solar water evaporation (SWE).  
 103 Interquartile Range, IQR. Case 1 is a reference system without solar evaporators. Case 2 includes solar  
 104 evaporators. Case 3 further pumps vapor out through a condensing tube for forced condensation with  
 105 additional photovoltaics. Case 4 uses coated glass (condensation-enhanced) to condense the water  
 106 without external energy input. Case 5 integrates both the condensing tube (powered by photovoltaics)  
 107 and condensation-enhanced glass for condensation.

108

109

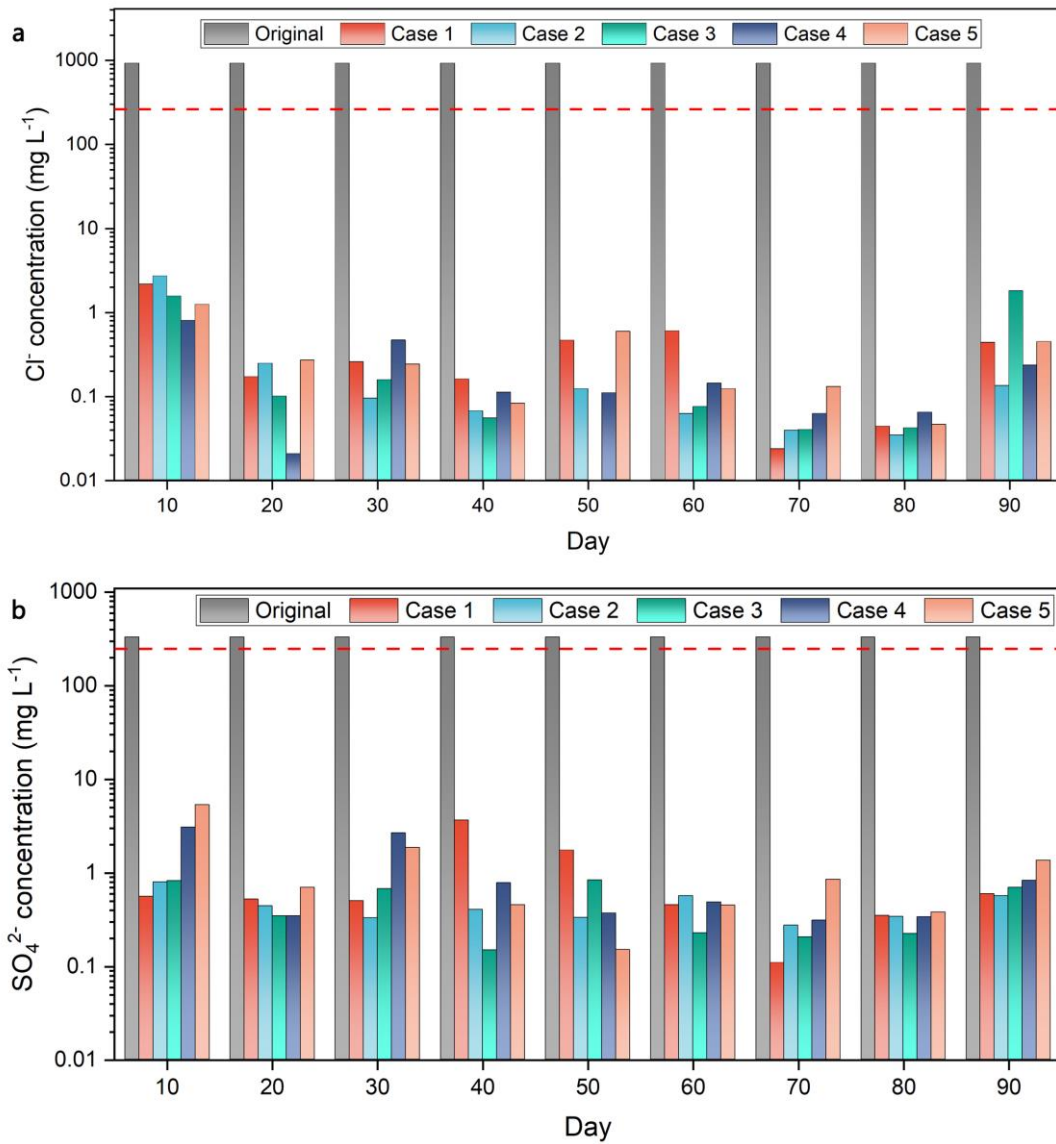

110

111 Supplementary Fig. 5 The ion concentration of the produced water by solar water evaporation (SWE).

112 (a) Cl<sup>-</sup>. (b) SO<sub>4</sub><sup>2-</sup>. The red dashed line refers to the World Health Organization-defined criteria. Case 1

113 is a reference system without solar evaporators. Case 2 includes solar evaporators. Case 3 further

114 pumps vapor out through a condensing tube for forced condensation with additional photovoltaics.

115 Case 4 uses coated glass (condensation-enhanced) to condense the water without external energy input.

116 Case 5 integrates both the condensing tube (powered by photovoltaics) and condensation-enhanced

117 glass for condensation.

118

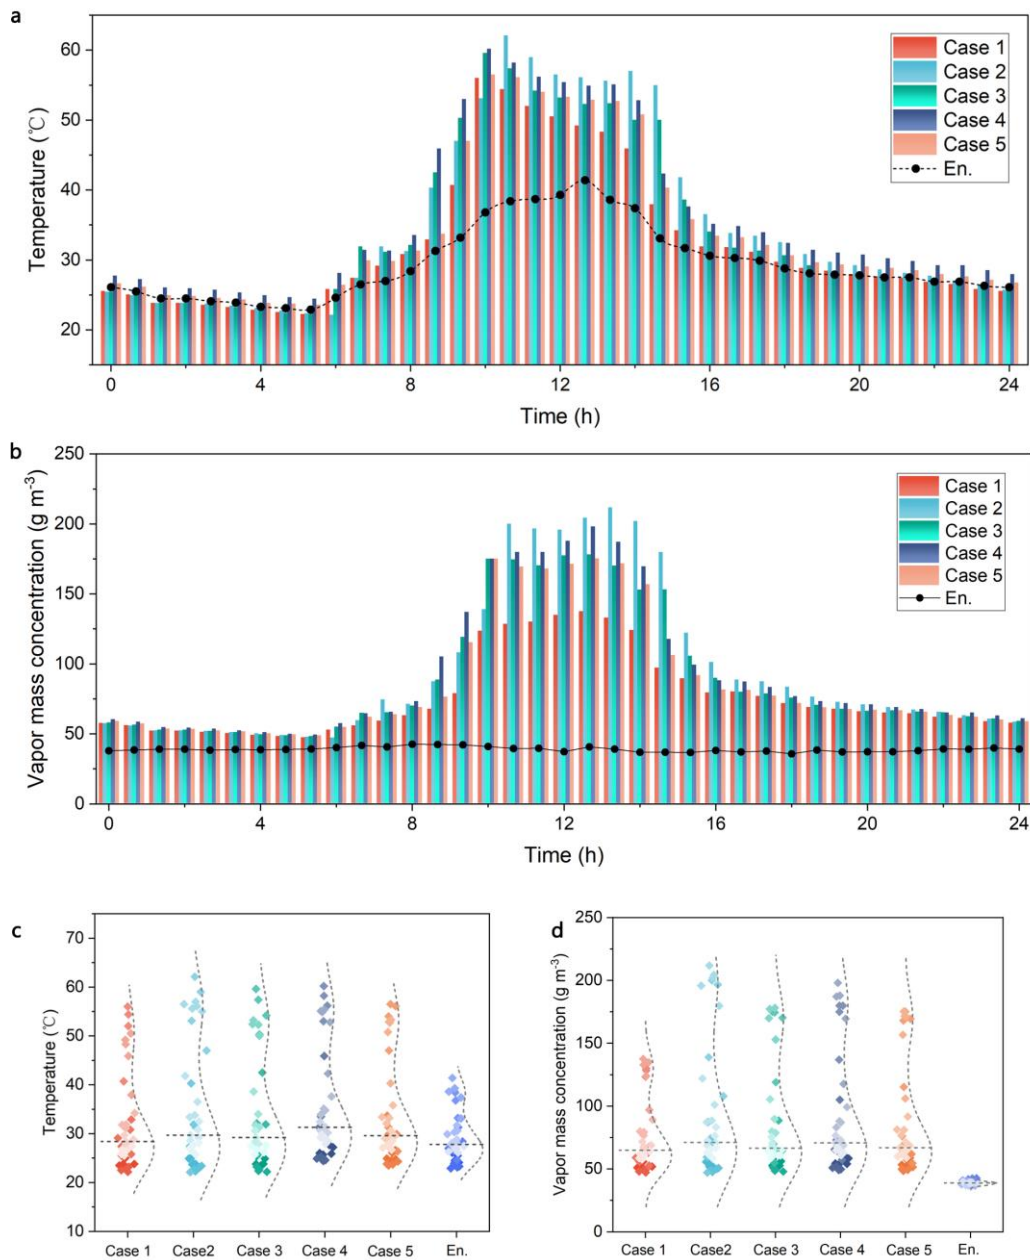

119

120 Supplementary Fig. 6 Operation parameters in cases 1–5 and of the environment. (a) Daily temperature

121 changes vs. time. (b) Daily water vapor concentration changes vs. time. Statistical distribution of the

122 (c) temperature and (d) water vapor concentration. The shades of the color from deep to light depicts

123 the 0 to 24 h, respectively. Case 1 is a reference system without solar evaporators. Case 2 includes

124 solar evaporators. Case 3 further pumps vapor out through a condensing tube for forced condensation

125 with additional photovoltaics. Case 4 uses coated glass (condensation-enhanced) to condense the water

126 without external energy input. Case 5 integrates both the condensing tube (powered by photovoltaics)

127 and condensation-enhanced glass for condensation. En. represents the environmental parameters.

128



129 **Supplementary Note 2. The dependence of solar-water energy efficiency**

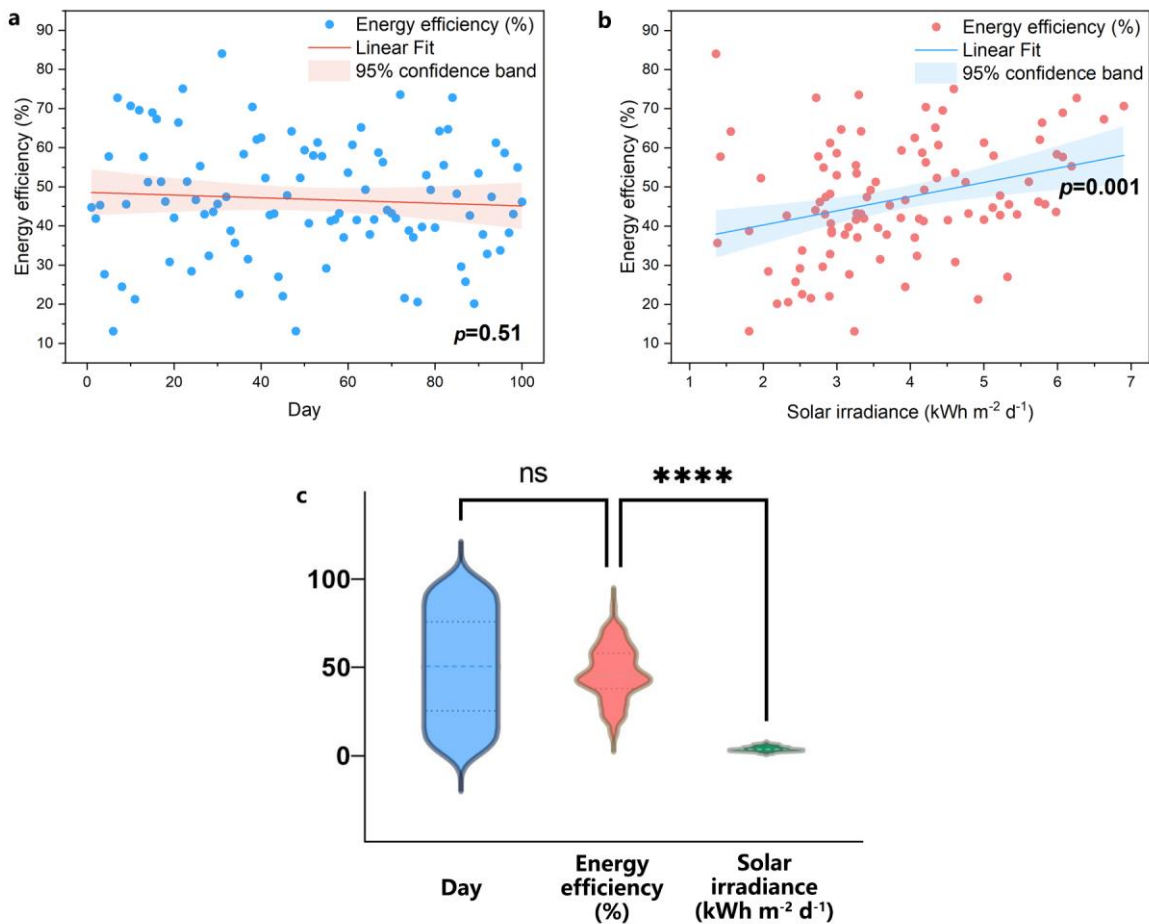

130

131 Supplementary Fig. 7 The linear regression between solar-water energy efficiency and (a) Day  
 132 (Slope=-0.03,  $p=0.51$ , ns), (b) Solar irradiance (Slope=3.6,  $p=0.001$ , \*\*\*). (c) Between-group  
 133 comparisons of the day, energy efficiency, and solar irradiance (Day vs. Energy efficiency,  $p>0.05$ , ns;  
 134 Energy efficiency vs. Solar irradiance,  $p<0.0001$ , \*\*\*\*).

135

136 By linear regression of energy efficiency and the day (Supplementary Fig. 7a), the  $p$ -value of the  
 137 slope is 0.51, demonstrating that the linear relationship between them is not significant. In contrast,  
 138 the  $p$ -value of the slope between the energy efficiency and the solar irradiance is 0.001, demonstrating  
 139 a significant linear relationship between them (Supplementary Fig. 7b).

140 Moreover, between-group comparisons (Day, Energy efficiency, and Solar irradiance) were  
 141 performed using independent samples Kruskal-Wallis one-way analysis of variance (ANOVA). The  
 142 results showed that the correlation between the energy efficiency and the day is not significant

143 ( $p > 0.9999$ ) while the correlation between the energy efficiency and the solar irradiance is significant  
144 ( $p < 0.0001$ , Supplementary Fig. 7c).

145

146 Supplementary Table 1 The Spearman coefficients between solar-water energy efficiency and Day or

147

Solar irradiance

| Spearman coefficients         | Day    | Solar irradiance     |
|-------------------------------|--------|----------------------|
| Solar-water energy efficiency | -0.078 | 0.34                 |
| p-value                       | 0.44   | $4.7 \times 10^{-4}$ |

148

149 Correlation analysis was further implemented to test for the effects of day and solar irradiance on  
150 solar-water energy efficiency. The data regarding solar irradiance and solar-water energy efficiency  
151 were ln transformed before analysis to minimize the impacts of the outliers. The results show that the  
152 solar-water energy efficiency has no significant relation with the pilot experiment day with  $p > 0.05$ . On  
153 the contrary, the Spearman coefficient is 0.34 between the efficiency and the solar irradiance with  
154  $p < 0.001$ .

155 From the analysis above, it is concluded that solar-to-water energy efficiency is positively related  
156 to solar irradiance while it stays stable within the 100-day operation.

157

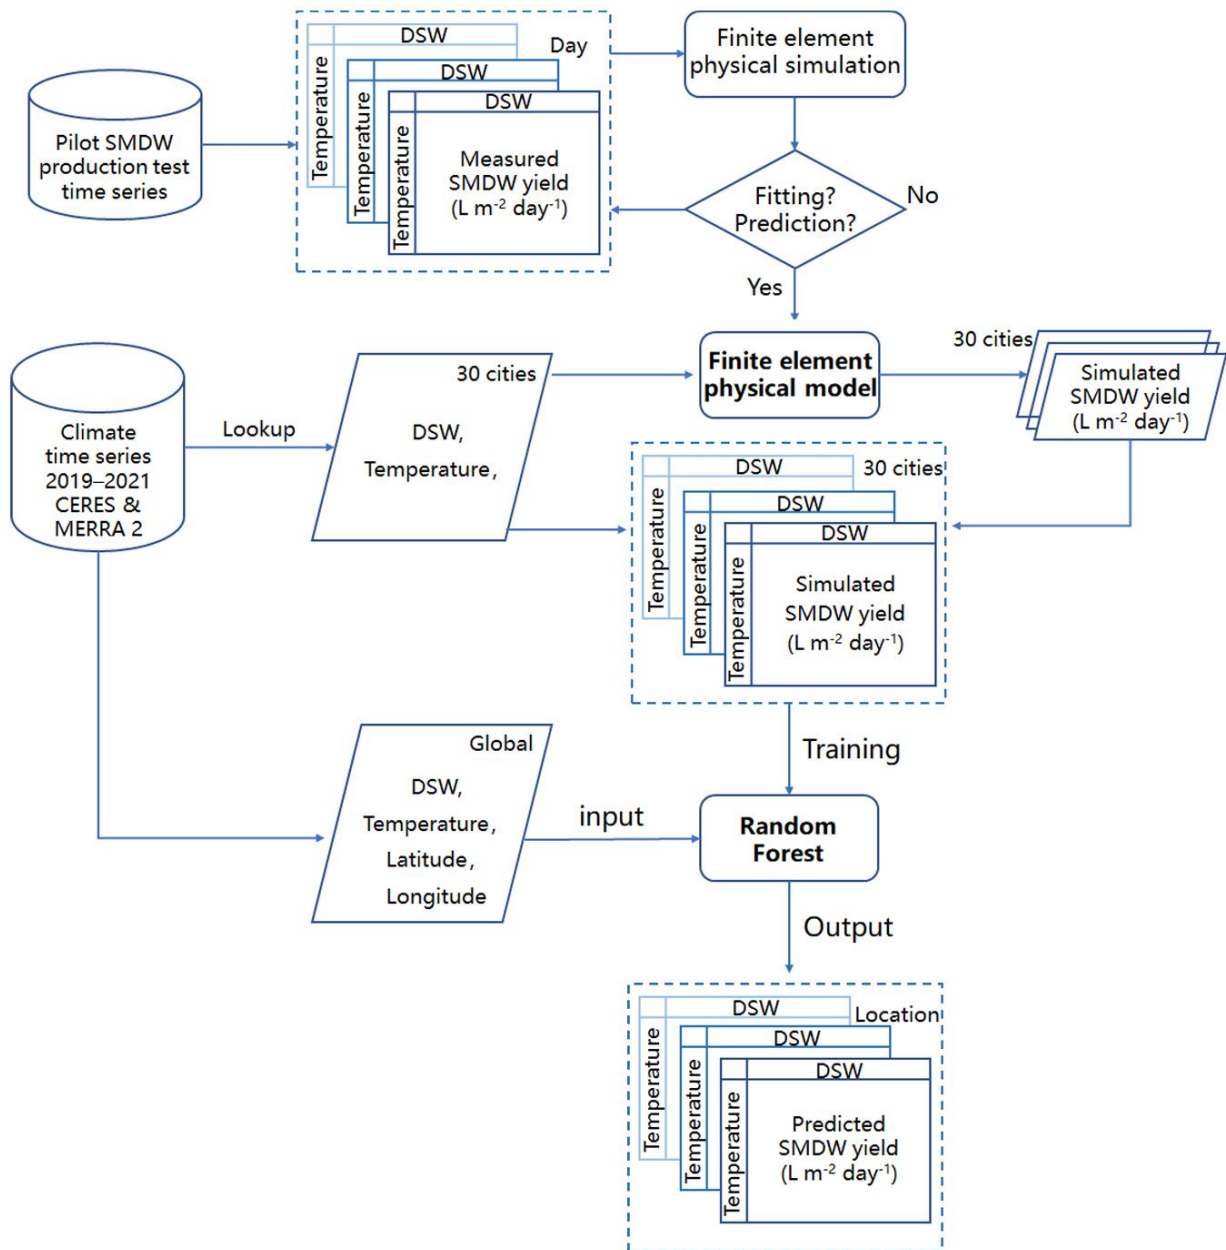

158

159 Supplementary Fig. 8 Data processing workflow of the physics-guided machine learning model to  
 160 predict the safely managed drinking water (SMDW). Cylinders indicate the data from the pilot study,  
 161 Clouds and the Earth’s Radiant Energy System (CERES) and Modern-Era Retrospective analysis for  
 162 Research and Applications, Version 2 (MERRA 2). The rest are table frames (the output documents),  
 163 rhombus (judgments of the model), rectangles (data processing), and parallelograms (output datasets).  
 164 Downward shortwave irradiation, DSW.

165

166

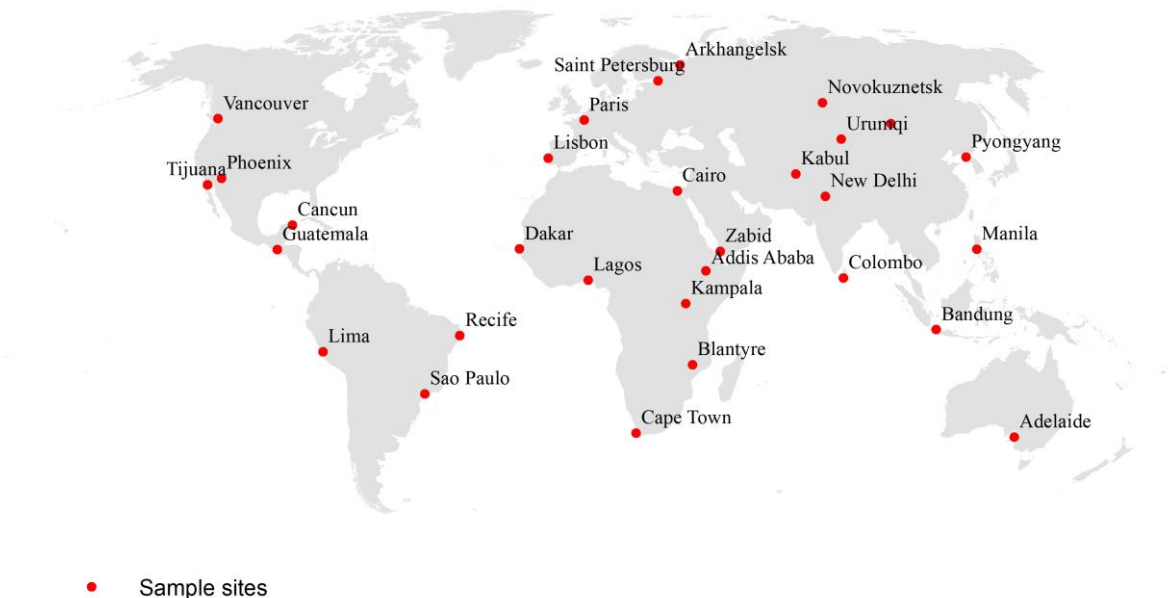

167

168 Supplementary Fig. 9 The selected sites for the training sets of the physics-guided machine learning  
 169 model.

170

171

Supplementary Table 2. Locations of the selected 30 cities over the world

| City        | Longitude | Latitude |
|-------------|-----------|----------|
| Tijuana     | -115.7439 | 31.7774  |
| Lima        | -76.4472  | -12.3607 |
| Sao Paulo   | -46.5646  | -23.5229 |
| Recife      | -35.0949  | -8.0802  |
| Guatemala   | -90.4729  | 14.5922  |
| Cancun      | -86.8254  | 21.0774  |
| Lagos       | 3.4156    | 6.5736   |
| Dakar       | -17.3282  | 14.7607  |
| Cairo       | 31.3193   | 30.0944  |
| Addis Ababa | 38.7241   | 9.0008   |
| Zabid       | 43.3325   | 14.1623  |
| Kampala     | 32.5934   | 0.3286   |
| Blantyre    | 34.9884   | -15.846  |
| Cape Town   | 18.6595   | -33.904  |
| Adelaide    | 138.7666  | -34.9316 |
| Kabul       | 69.377    | 34.5693  |

|                  |           |         |
|------------------|-----------|---------|
| New Delhi        | 77.1993   | 28.6996 |
| Colombo          | 79.9441   | 7.1402  |
| Bandung          | 107.7573  | -6.5379 |
| Manila           | 120.809   | 14.6857 |
| Urumqi           | 87.5864   | 43.8195 |
| Ulaanbaatar      | 106.8674  | 48.0789 |
| Saint Petersburg | 30.4245   | 59.9336 |
| Arkhangelsk      | 40.488    | 64.5961 |
| Novokuznetsk     | 87.1117   | 53.7366 |
| Pyongyang        | 125.8023  | 39.0779 |
| Lisbon           | -9.1743   | 38.766  |
| Phoenix          | -112.0436 | 33.4795 |
| Vancouver        | -123.1398 | 49.3626 |
| Paris            | 2.5218    | 48.9748 |

172

173

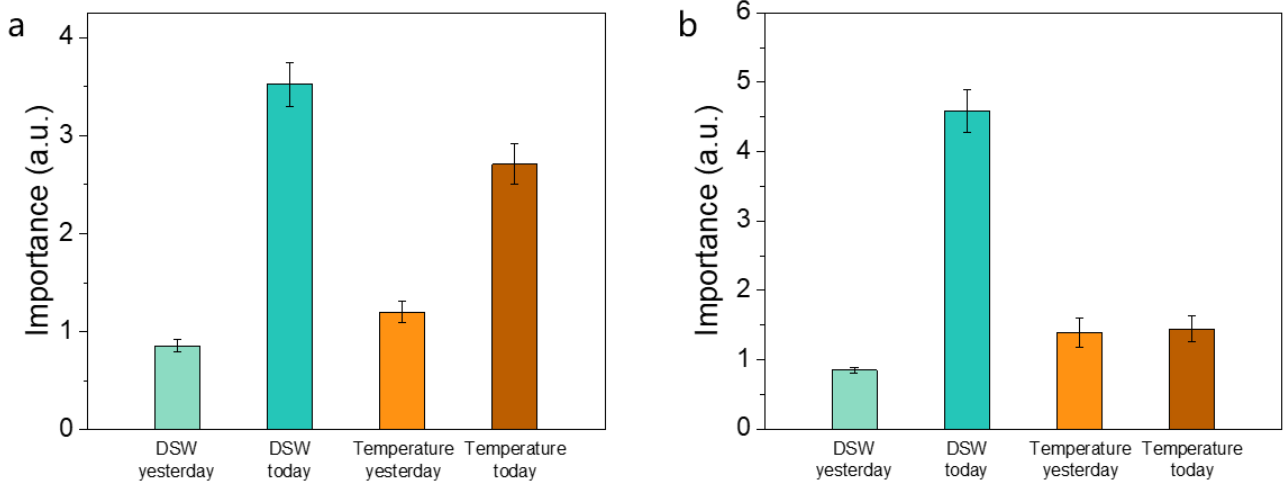

174

175 Supplementary Fig. 10 The importance of each input parameter in the physics-guided machine learning

176 model for (a) evaporation-optimized case (Eva. opt.) and (b) evaporation-condensation-optimized case

177 (Eva.-cond. opt.). For each variable, the rise in prediction error if the values of each variable are

178 permuted across the out-of-bag observations was measured. This measure is computed for every tree,

179 then averaged over the entire ensemble and divided by the standard deviation over the entire ensemble.

180 Downward shortwave irradiation, DSW.

181

182

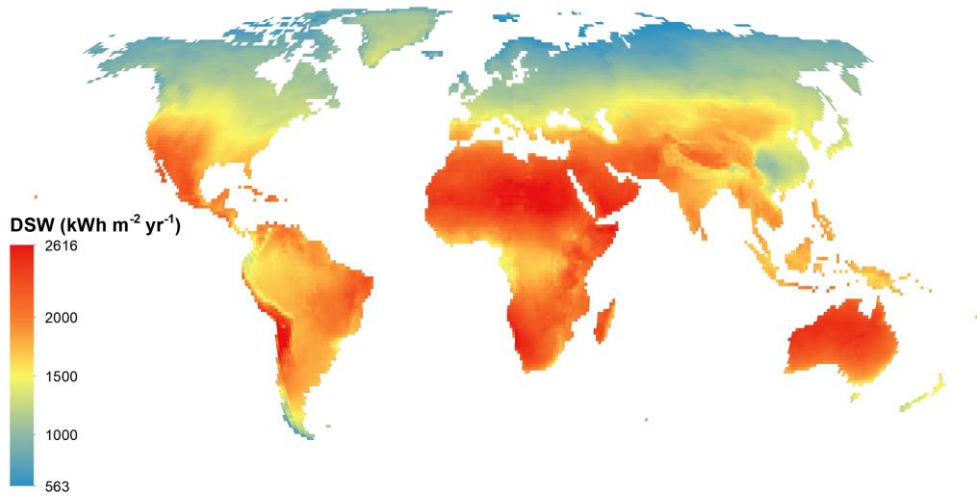

183

184 Supplementary Fig. 11 Global distribution of the yearly total surface downward shortwave irradiation  
 185 (DSW).

186

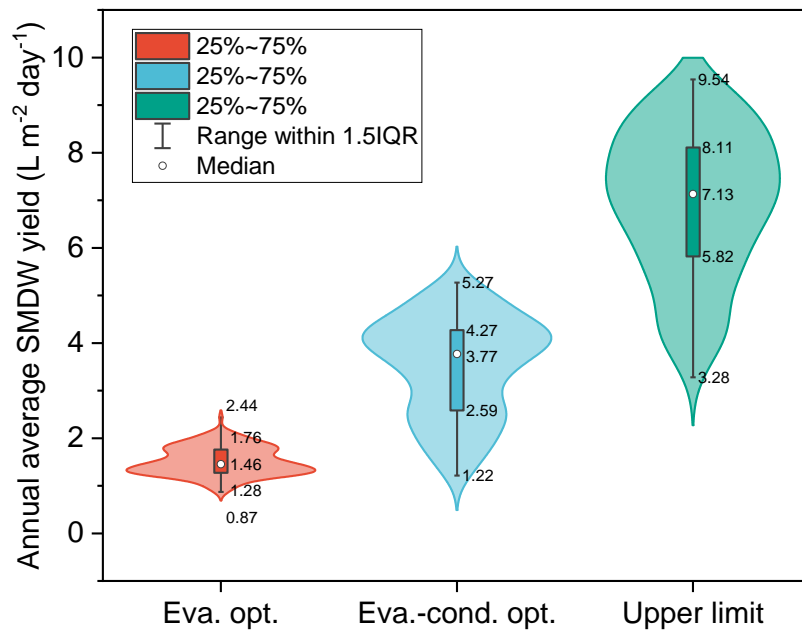

187

188 Supplementary Fig. 12 The violin plot of annual average safely managed drinking water (SMDW)  
 189 yield under the three scenarios. Interquartile Range, IQR; Evaporation-optimized case, Eva. opt.;  
 190 evaporation-condensation-optimized case, Eva.-cond. opt. The upper limit refers to the scenario that  
 191 converts all the sunlight to power the solar evaporation for SMDW yield.

192

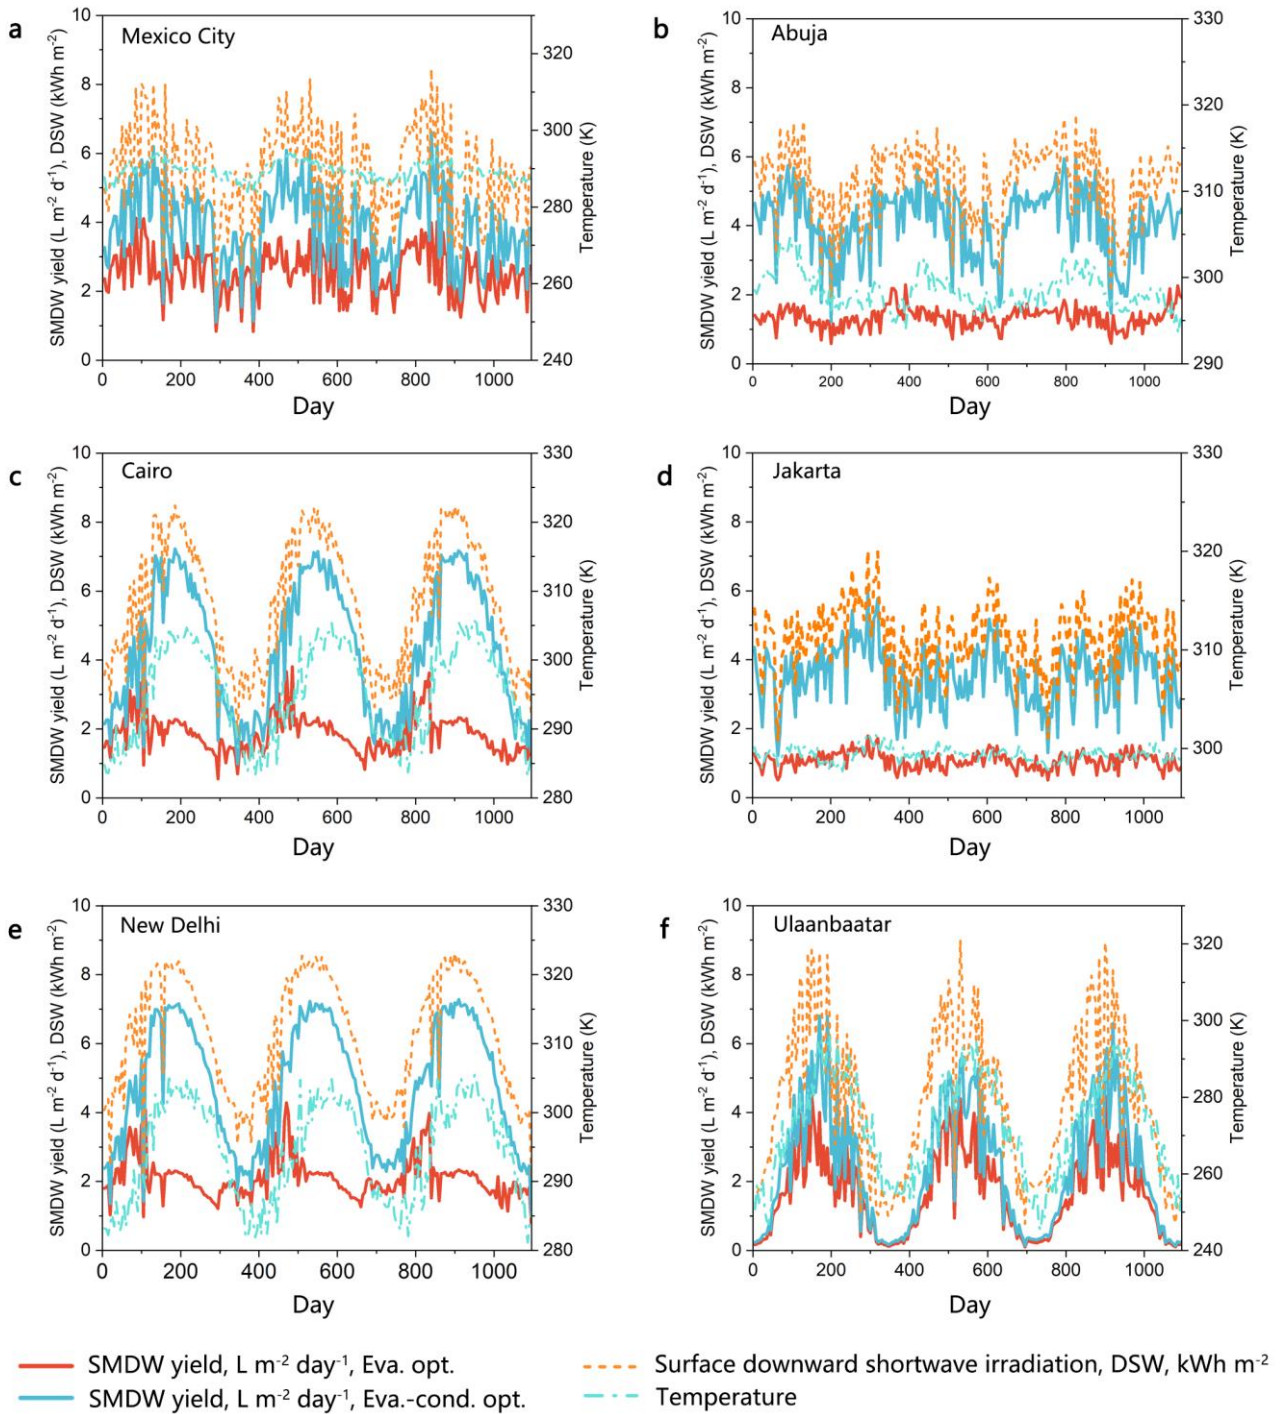

193

194 Supplementary Fig. 13 Seasonal variations of the safely managed drinking water (SMDW) yield for 6  
195 six representative cities across the world. (a) Mexico City. (b) Abuja. (c) Cairo. (d) Jakarta. (e) New  
196 Delhi. (f) Ulaanbaatar. Evaporation-optimized case, Eva. opt.; evaporation-condensation-optimized  
197 case, Eva.-cond. opt..

198

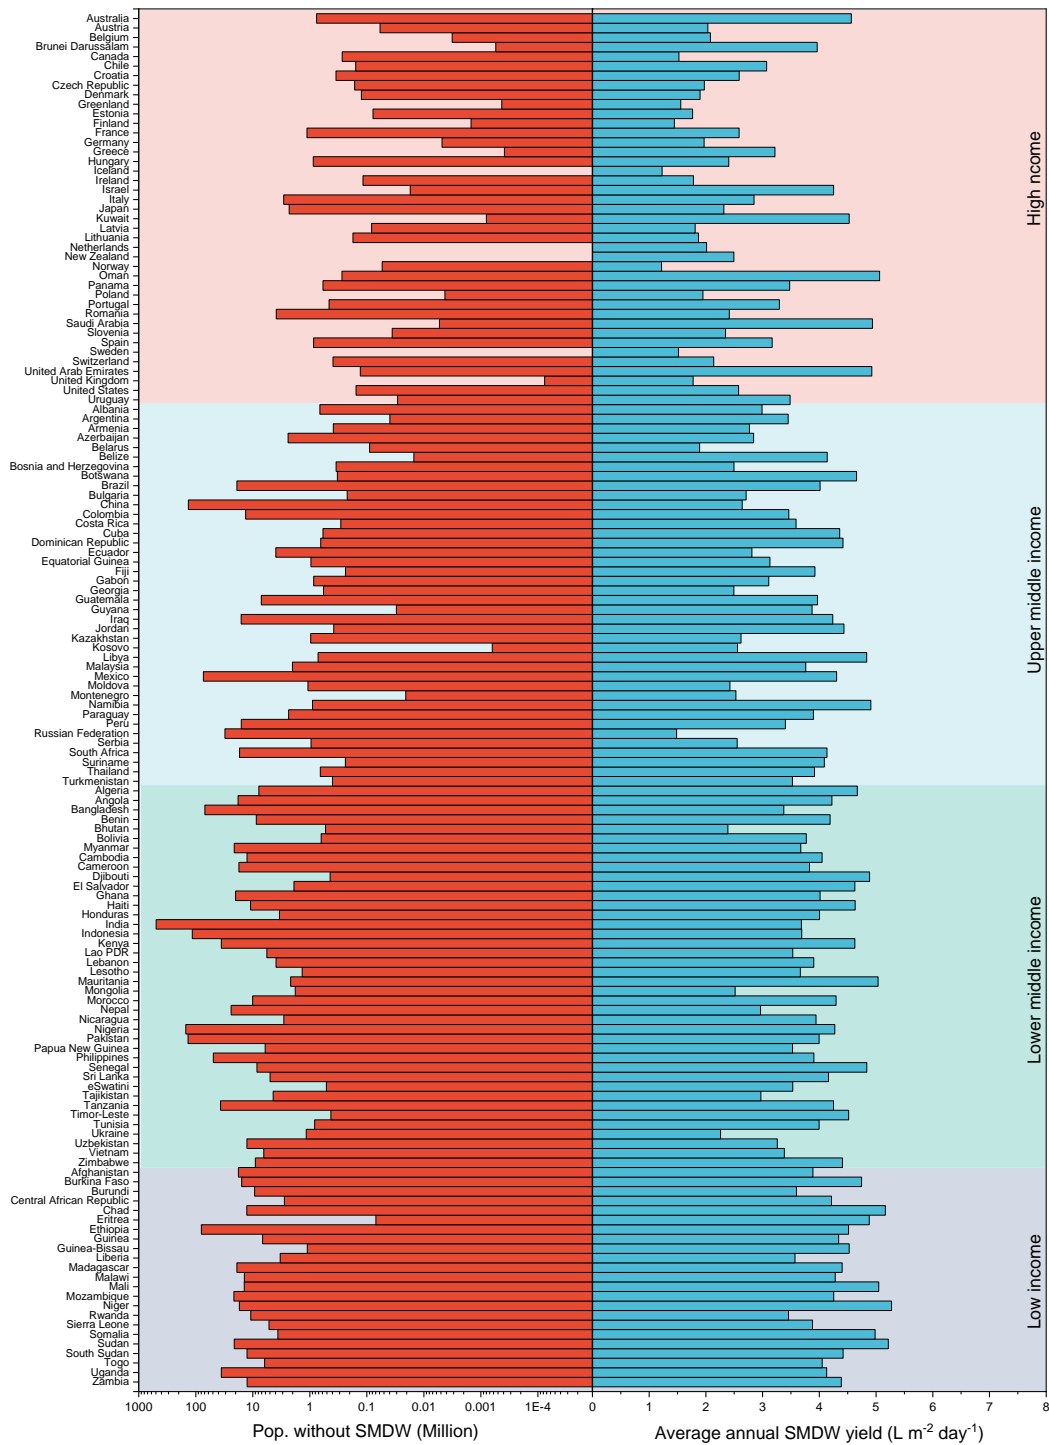

199  
 200 Supplementary Fig. 14 Pyramid chart of country data on average annual water production and water-  
 201 scarce population (evaporation-condensation-optimized system). The low income, lower middle  
 202 income, upper middle income and, upper income countries are classified by the World Bank  
 203 ([https://blogs.worldbank.org/en/opendata/new-world-bank-country-classifications-income-level-](https://blogs.worldbank.org/en/opendata/new-world-bank-country-classifications-income-level-2022-2023)  
 204 [2022-2023](https://blogs.worldbank.org/en/opendata/new-world-bank-country-classifications-income-level-2022-2023)).  
 205



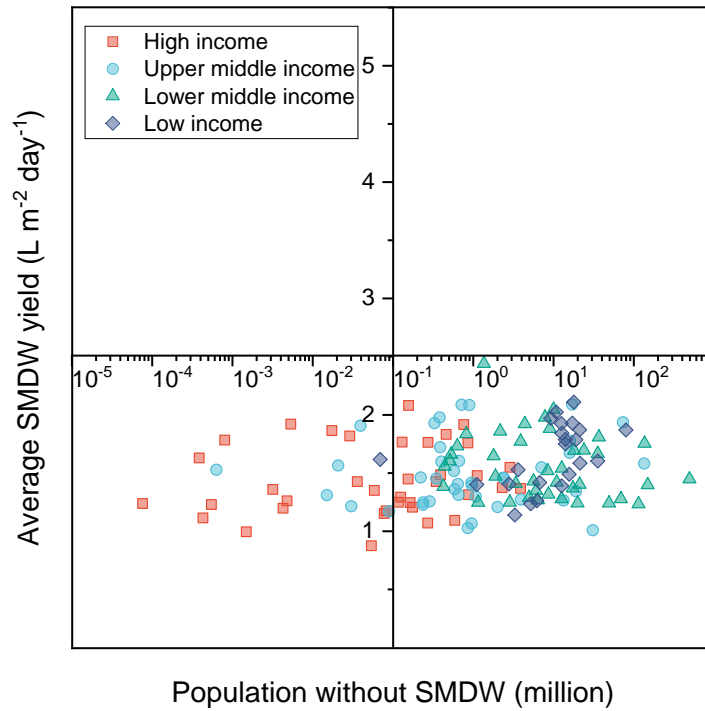

206

207 Supplementary Fig. 15 Four quadrant charts of the annual safely managed drinking water (SMDW)  
 208 yield (evaporation-optimized system) concerning the population without SMDW of different income-  
 209 level countries. The low income, lower middle income, upper middle income and, upper income  
 210 countries are classified by the World Bank ([https://blogs.worldbank.org/en/opendata/new-world-bank-](https://blogs.worldbank.org/en/opendata/new-world-bank-country-classifications-income-level-2022-2023)  
 211 [country-classifications-income-level-2022-2023](https://blogs.worldbank.org/en/opendata/new-world-bank-country-classifications-income-level-2022-2023)).

212

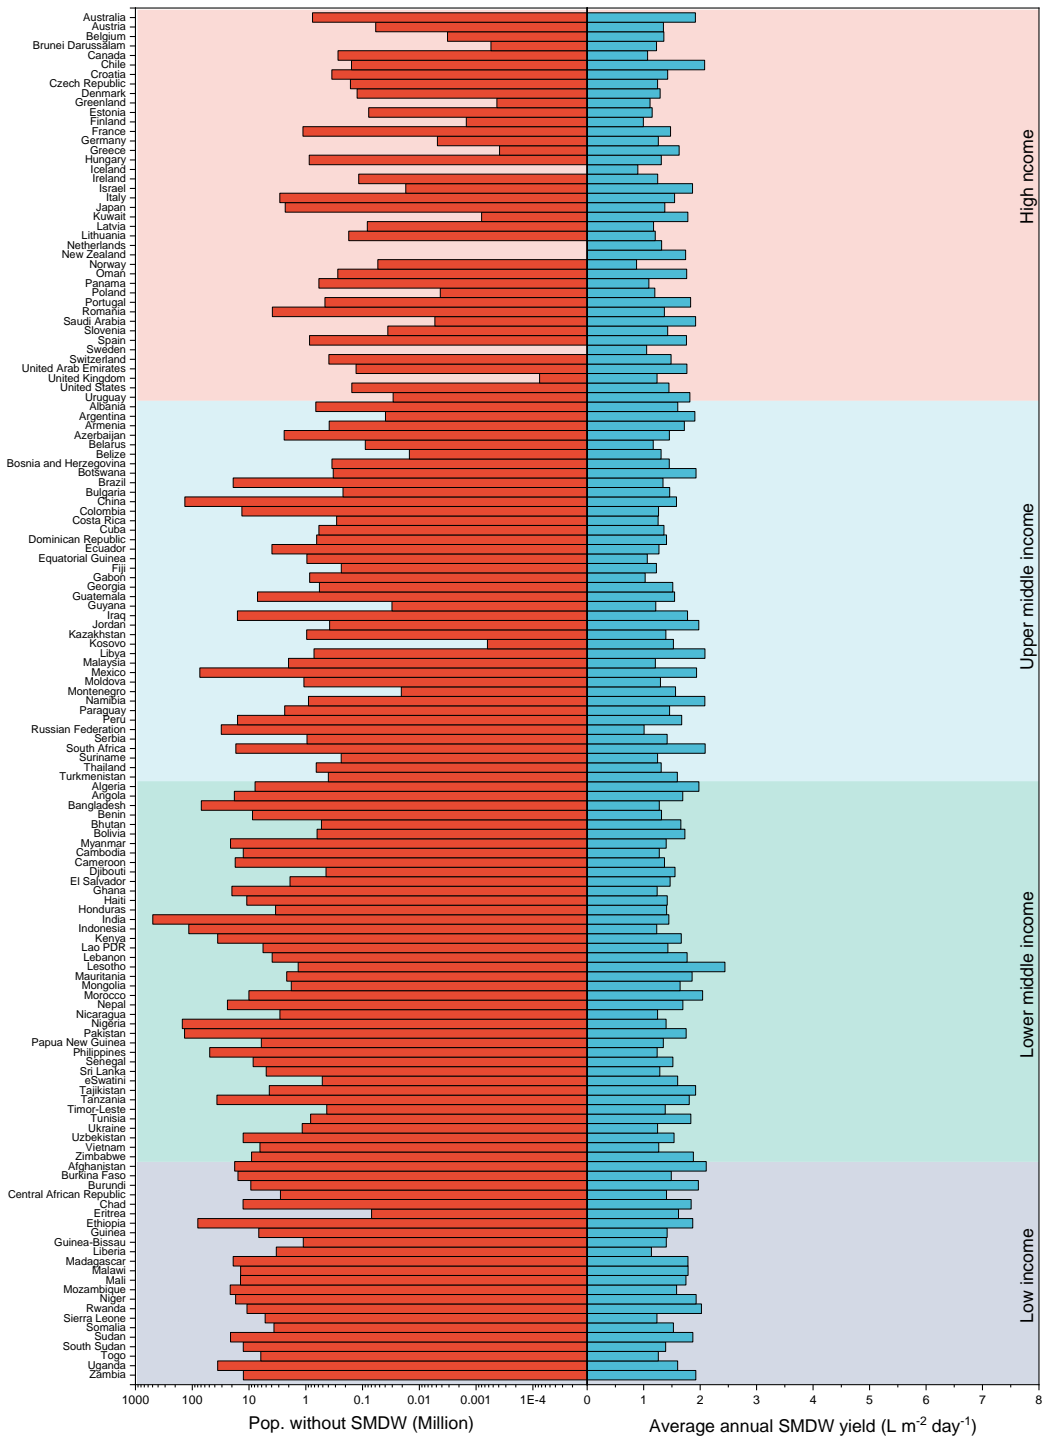

213

214 Supplementary Fig. 16 Pyramid chart of country data on average annual safely managed drinking water  
 215 (SMDW) production and water-scarce population (evaporation-optimized system). The low income,  
 216 lower middle income, upper middle income and, upper income countries are classified by the World  
 217 Bank ([https://blogs.worldbank.org/en/opendata/new-world-bank-country-classifications-income-](https://blogs.worldbank.org/en/opendata/new-world-bank-country-classifications-income-level-2022-2023)  
 218 [level-2022-2023](https://blogs.worldbank.org/en/opendata/new-world-bank-country-classifications-income-level-2022-2023)).

219

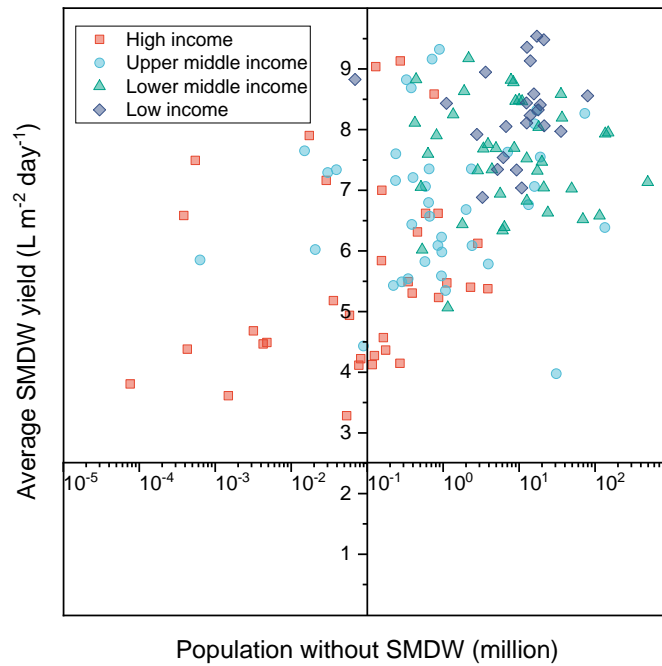

220

221 Supplementary Fig. 17 Four quadrant charts of the annual safely managed drinking water (SMDW)  
 222 yield (Upper limit) concerning the population without SMDW of different income-level countries. The  
 223 low income, lower middle income, upper middle income and, upper income countries are classified by  
 224 the World Bank ([https://blogs.worldbank.org/en/opensource/new-world-bank-country-classifications-](https://blogs.worldbank.org/en/opensource/new-world-bank-country-classifications-income-level-2022-2023)  
 225 [income-level-2022-2023](https://blogs.worldbank.org/en/opensource/new-world-bank-country-classifications-income-level-2022-2023)).

226

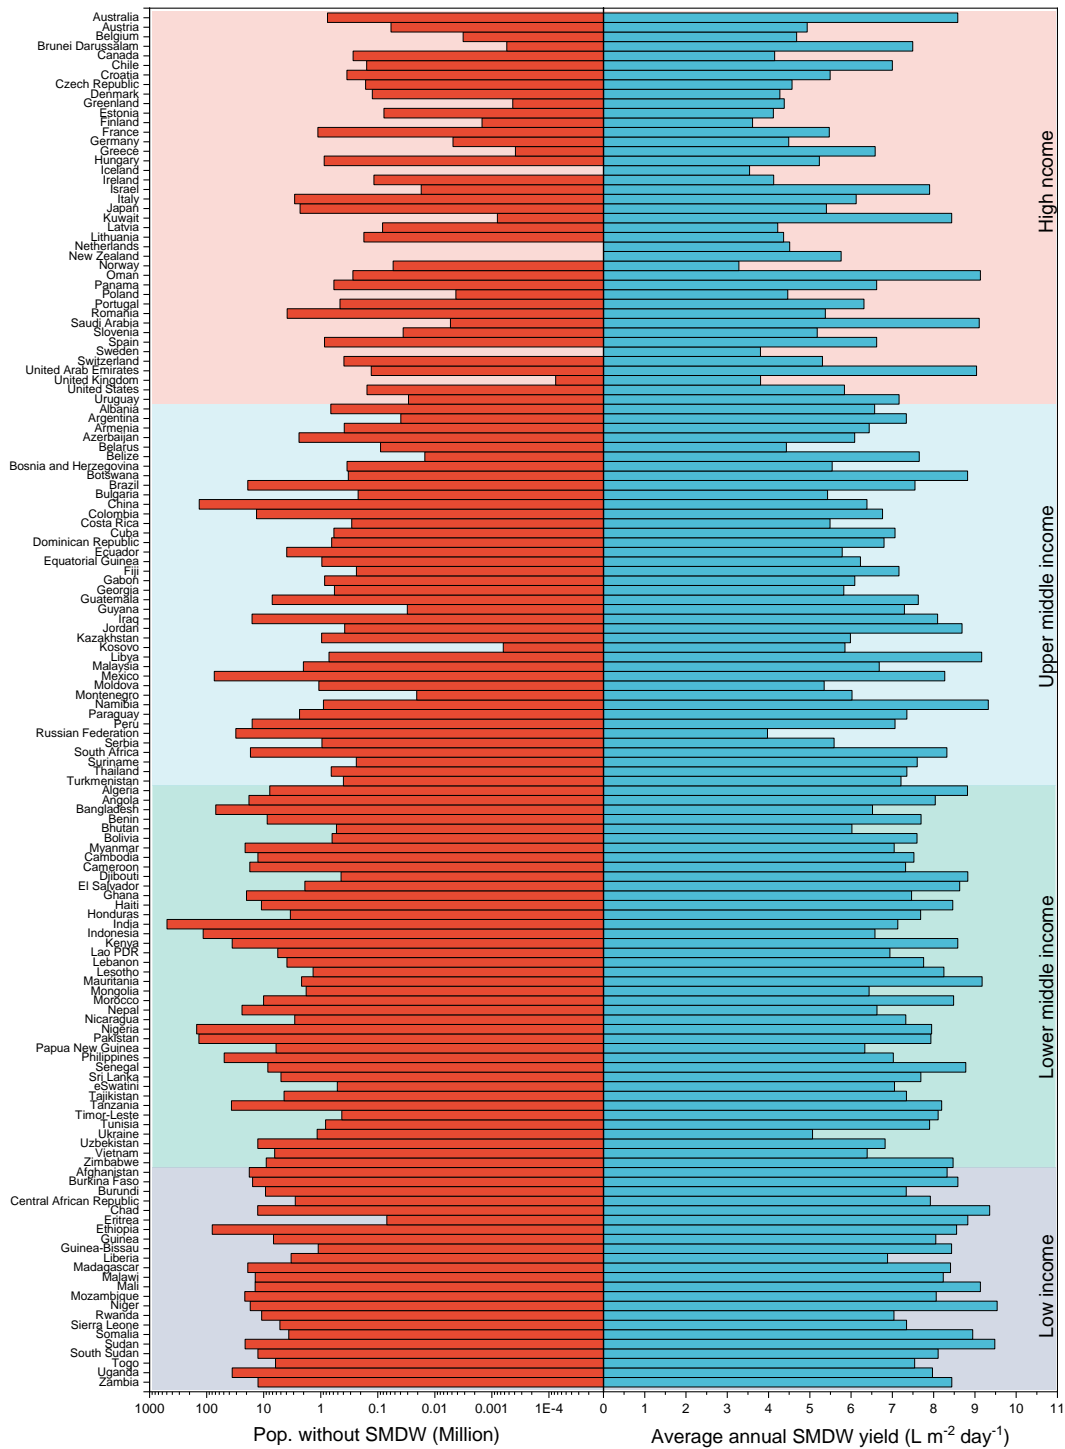

227

228 Supplementary Fig. 18 Pyramid chart of country data on average annual safely managed drinking water  
 229 (SMDW) production and water-scarce population (upper limit). The low income, lower middle income,  
 230 upper middle income and, upper income countries are classified by the World Bank  
 231 ([https://blogs.worldbank.org/en/opendata/new-world-bank-country-classifications-income-level-](https://blogs.worldbank.org/en/opendata/new-world-bank-country-classifications-income-level-2022-2023)  
 232 [2022-2023](https://blogs.worldbank.org/en/opendata/new-world-bank-country-classifications-income-level-2022-2023)).  
 233

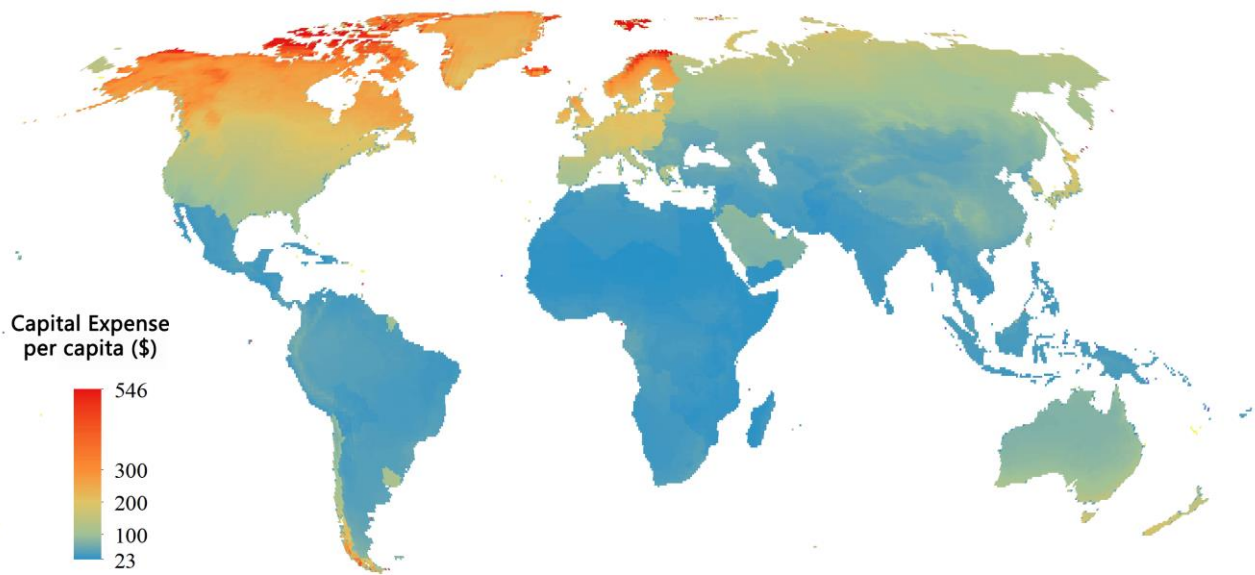

234

235 Supplementary Fig. 19 Map of the Capital expense per capita of solar water evaporation (evaporation-  
236 condensation-optimized system). The calculation of capital expense can be seen in the supplementary  
237 note 3.

238

239

240

241

242

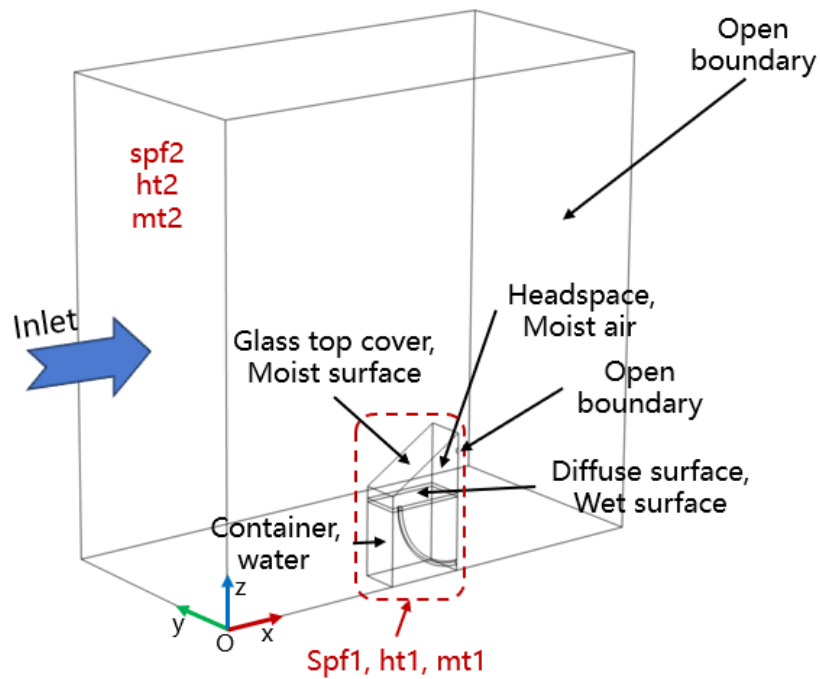

243

244 Supplementary Fig. 20 Schematic diagrams of the COMSOL model setups. COMSOL refers to the  
 245 software “COMSOL Multiphysics”. Moist surface refers to the condensation surface. The wet surface  
 246 refers to the evaporation surface. Open boundary on the container surface refers to the boundary that  
 247 connects the inner space of the container and outer atmosphere. The open boundary of the atmosphere  
 248 refers to the outlet of the wind. Single-phase flow (spf), heat transfer (ht), moist transfer (mt) and  
 249 radiation (rad) are modules in the COMSOL Multiphysics, and 1 refers to the domain in the solar  
 250 evaporation device, and 2 refers to the atmosphere domain.

251

252

253

254

255 **Supplementary Note 3. Cost estimation**

256 ***Capital cost:***

257

Supplementary Table 3 The capital cost per area

| Classification | Content          | Unit price               | Usage per area            | Cost per area/\$ m <sup>-2</sup> |
|----------------|------------------|--------------------------|---------------------------|----------------------------------|
| Raw            | Solar evaporator | \$0.070 kg <sup>-1</sup> | 6.0 kg m <sup>-2</sup>    | 0.417                            |
| materials      | Sodium Alginate  | \$3.0 kg <sup>-1</sup>   | 0.0008 kg m <sup>-2</sup> | 0.024                            |

|            |                           |                           |                           |         |
|------------|---------------------------|---------------------------|---------------------------|---------|
|            | PVA                       | \$1.3 kg <sup>-1</sup>    | 0.0008 kg m <sup>-2</sup> | 0.0104  |
|            | Poly(methyl methacrylate) | \$2.2 kg <sup>-1</sup>    | 18.17 kg m <sup>-2</sup>  | 40.44   |
|            | Glass                     | \$0.24 kg <sup>-1</sup>   | 14.43 kg m <sup>-2</sup>  | 3.44    |
| Energy     | Electricity               | \$0.088 kWh <sup>-1</sup> | 3 kWh m <sup>-2</sup>     | 0.265   |
| Facilities | Water container           | -                         | \$1 m <sup>-2</sup>       | 1.0     |
|            | Silicone tubes            | \$2.55 kg <sup>-1</sup>   | 0.063 kg m <sup>-2</sup>  | 0.161   |
| Total      |                           |                           |                           | 45.7574 |

258

259 The raw material of the solar evaporator is sugarcane and the cost is its price. The usage of the  
 260 sugarcane (kg m<sup>-2</sup>) is estimated assuming that sugarcane has a density of water (1g cm<sup>-3</sup>) as  
 261  $1/(1000\text{g}/1\text{g cm}^{-3}/0.6\text{ cm}) * 10000\text{ cm}^2\text{ m}^{-2}$ , where 0.6 cm is the thickness of the solar evaporator  
 262 (sugarcane).

263 Sodium alginate (SA), PVA usage was calculated as  $200\text{ mL m}^{-2} * 0.04\text{ g}/100\text{ mL}/1000\text{ g kg}^{-1}$ ,  
 264  $200\text{ mL m}^{-2}$  is the amount of the cast solution used per square meter and  $0.04\text{ g}/100\text{ mL}$  is the  
 265 concentration of the SA and PVA solutions.

266 Poly(methyl methacrylate) usage (kg m<sup>-2</sup>) was calculated considering a device with a floor area  
 267 of  $4\text{ m}^2$ , container height of 0.2 m, top cover tilting angle of 30°:  $(2\text{ m} * 2\text{ m} + 0.2\text{ m} * 2\text{ m} + (0.2\text{ m} + 1.36$   
 268  $\text{m}) * 2\text{ m}/2 * 2 + 1.36\text{ m} * 2) * 0.006\text{ m} * 1.19 * 10^3\text{ kg m}^{-3}/4\text{ m}^2$ , where 2 m is the bottom side length, 1.36 m  
 269 is the backboard height, 0.006 m is the thickness of the poly(methyl methacrylate) plate and  $1.18 * 10^3$   
 270  $\text{kg m}^{-3}$  is the density.

271 The glass usage (kg m<sup>-2</sup>) is calculated considering a device with a floor area of  $4\text{ m}^2$ , container  
 272 height of 0.2 m, top cover tilting angle of 30°:  $2.32\text{ m} * 2\text{ m} * 0.005\text{ m} * 2500\text{ kg m}^{-3}/4\text{ m}^2$ , where 0.005  
 273 m is the thickness and  $2500\text{ kg m}^{-3}$  is the density of glass.

274 The cost of electricity is estimated according to the manufacturing energy of devices, including  
 275 solar evaporators and coating fabrication. The cost of facilities mainly includes water containers and  
 276 silicone tubes.

277

| National income levels | Median monthly wage/\$ | Labor costs in terms of wages |
|------------------------|------------------------|-------------------------------|
| Low income             | 106.23                 | 5.68                          |
| Lower-middle income    | 193.41                 | 10.35                         |
| Upper-middle income    | 390.00                 | 20.86                         |
| High income            | 2075.06                | 111.00                        |

279

280 The low income, lower middle income, upper middle income and, upper income countries are  
 281 classified by the World Bank ([https://blogs.worldbank.org/en/opendata/new-world-bank-country-](https://blogs.worldbank.org/en/opendata/new-world-bank-country-classifications-income-level-2022-2023)  
 282 [classifications-income-level-2022-2023](https://blogs.worldbank.org/en/opendata/new-world-bank-country-classifications-income-level-2022-2023)). We take the median monthly income of China as a reference  
 283 and estimate the labor cost to be \$20.86 m<sup>-2</sup> according to the actual manufacturing price for the solar  
 284 evaporation devices. Then the labor cost is categorized into “low-income”, “lower-middle income”,  
 285 “upper-middle income” and “high-income” countries. The labor costs were obtained by normalizing  
 286 the median monthly wage of these four categories of countries.

287

### 288 ***Operation and maintenance cost:***

289 Our devices mainly comprise acrylic containers, carbon solar evaporators, top cover glass,  
 290 hydrogel-based condensation coatings, and connecting silicone tubes.

291 The **operation cost** refers to the total price of the parts in the solar evaporation device that need  
 292 to be replaced after a certain period. It mainly includes solar evaporators and hydrogel-based  
 293 condensation coatings.

294 The solar absorber used in our study is inorganic biochar, which is stable in the environment.  
 295 According to previous reports, solar stills composed of typical inorganic carbon-based black paint  
 296 exhibit a long lifespan ranging from 2-10 years<sup>1-3</sup>. In addition, during our 100-day outdoor test, the  
 297 solar absorbers showed no observable deterioration. Thus, its lifespan is estimated at 2 years.

298 The coating for accelerated condensation is composed mainly of PVA fibers. PVA is chemically  
 299 stable and widely used in coatings and fibers. As previously reported, PVA coatings are stable (remain  
 300 hydrophilic and antifogging) after 2-7 months of exposure to a hot and humid environment or daily



301 use<sup>4,5</sup>. Moreover, PVA has a strong bond with the matrix, exhibiting resistance to an alkaline  
302 environment. They also estimated that the tensile strength of PVA fiber could be preserved after even  
303 60 years of ultraviolet irradiance in a hot environment<sup>6</sup>. In addition, the coating used in our outdoor  
304 test shows no obvious deterioration after 100 days, so its lifespan is also estimated at 2 years for  
305 simplification of calculations.

306 Therefore, from Supplementary Table 3, the solar evaporator, sodium alginate, PVA, and the  
307 electricity used for fabrication is a total of \$0.72 m<sup>-2</sup>, which is considered as consumable material and  
308 should be replaced. The operation cost was comprised of the substitution of the solar evaporators and  
309 condensation coatings and the auxiliary software cost (2% of the materials cost).

310 The **maintenance cost** refers to the repair of the whole solar evaporation device (whole capital  
311 cost). For the whole devices mainly made of Poly(methyl methacrylate) (PMMA), its lifetime is  
312 estimated as 10 years considering the property of the PMMA<sup>7,8</sup>. Therefore, besides the operation cost  
313 to replace the solar evaporators and the condensation coatings, the maintenance costs were estimated  
314 at 3% of the capital costs per year and comprised 30% of the capital costs to fix the problems that the  
315 whole solar evaporation device may encounter.

316

317

### 318 **Supplementary References:**

- 319 1 Ni, G. *et al.* A salt-rejecting floating solar still for low-cost desalination. *Energy Environ. Sci.* **11**, 1510-  
320 1519 (2018).
- 321 2 Kabeel, A. E. *et al.* Effect of water depth on a novel absorber plate of pyramid solar still coated with TiO<sub>2</sub>  
322 nano black paint. *J. Cleaner Prod.* **213**, 185-191 (2019).
- 323 3 Abdullah, A. S., Younes, M. M., Omara, Z. M. & Essa, F. A. New design of trays solar still with enhanced  
324 evaporation methods – Comprehensive study. *Sol. Energy* **203**, 164-174 (2020).
- 325 4 Yang, M. *et al.* Structure and properties of polyvinyl alcohol (PVA)/Al<sub>2</sub>O<sub>3</sub> antifogging coating with self-  
326 healing performance. *J. Coat. Technol. Res.* (2024).
- 327 5 Yu, X. *et al.* Highly durable antifogging coatings resistant to long-term airborne pollution and intensive  
328 UV irradiation. *Mater. Des.* **194** (2020).
- 329 6 Silva, F. A., Peled, A., Zukowski, B. & Toledo Filho, R. D. in *A Framework for Durability Design with*  
330 *Strain-Hardening Cement-Based Composites (SHCC): State-of-the-Art Report of the RILEM Technical*  
331 *Committee 240-FDS* (eds Gideon P. A. G. van Zijl & Volker Slowik) 59-78 (Springer Netherlands, 2017).
- 332 7 Halliwell, S. M. *Weathering of plastics glazing materials*, Loughborough University of Technology, (1996).

333 8 Gilbert, M. in *Brydson's Plastics Materials (Eighth Edition)* (ed Marianne Gilbert) 75-102 (Butterworth-  
334 Heinemann, 2017).  
335
